# Supplementary material
Source: PubMed Central journal article supplement (PMC5659292)
Supplement: NIHMS882876-supplement-Supplemental_Material.pdf [file NIHMS882876-supplement-Supplemental_Material.pdf]

**Supplemental Material**

**Use of Statins and Outcomes in Intracerebral Hemorrhage  
Patients**

**Online Supplementary Table I:** Characteristics and outcomes of studies comparing statin and non-statin users in ICH patients

| Study                            | Country       | Statin users       |                        |     | Non-statin users |                      | Comparison                                                                      | Mortality Time             | Other Outcomes                     |                      |
|----------------------------------|---------------|--------------------|------------------------|-----|------------------|----------------------|---------------------------------------------------------------------------------|----------------------------|------------------------------------|----------------------|
|                                  |               | Prior <sup>†</sup> | Continued <sup>‡</sup> | New | None             | Stopped <sup>*</sup> |                                                                                 |                            | Variable                           | Time                 |
| Tapia-Perez et al. <sup>1</sup>  | Mexico        | 63                 | 45                     | NA  | 260              | 18                   | Continued statins versus Stopped statins                                        | 30 d/3 m/1y <sup>a</sup>   | GOS/NIHSS                          | DC/6 m <sup>a</sup>  |
| Priglinger et al. <sup>2</sup>   | International | 204                | NA                     | NA  | 2980             | NA                   | Prior statins versus No statins                                                 | 3 m                        | mRS                                | 3 m                  |
| Gioia et al. <sup>3</sup>        | Canada        | 14                 | NA                     | NA  | 59               | NA                   | Prior statins versus No statins                                                 | NA                         | PE <sup>β</sup><br>HE<br>NIHSS/GCS | 24 h                 |
| Pan et al. <sup>4</sup>          | China         | NA                 | 220                    | NA  | 2998             | NA                   | Inpatient statins versus no statins                                             | 3 m/1 y <sup>a</sup>       | mRS                                | 3 m/1 y <sup>a</sup> |
| Flint et al. <sup>5</sup>        | USA           | 1160               | 769                    | 425 | 1896             | 391                  | Inpatient statins versus no statins<br>Continued statins versus stopped statins | 30 d <sup>a</sup>          | DC to home/rehab                   | DC <sup>a</sup>      |
| Falcone et al. <sup>6</sup>      | USA           | 42                 | NA                     | NA  | 97               | NA                   | Prior statins versus No statins                                                 | NA                         | HV <sup>a</sup>                    | NA                   |
| Winkler <sup>7</sup>             | USA           | 125                | 75                     | 65  | 236              | 50                   | Any statins versus no statins                                                   | 1 year <sup>a</sup>        | Modified Barthel Index             | 1 year <sup>a</sup>  |
| Tapia-Perez et al. <sup>8</sup>  | Mexico        | 29                 | 29                     | 0   | 149              | 0                    | Continued statins versus no statins                                             | DC/3 m<br>6 m <sup>a</sup> | NIHSS                              | DC                   |
| Mustanoja et al. <sup>9</sup>    | Finland       | 187                | NA                     | NA  | 777              | NA                   | Prior statins versus No statins                                                 | DC/3 m/1 y                 | mRS/ DC to home/rehab              | DC                   |
| King et al. <sup>10</sup>        | Singapore     | 292                | NA                     | NA  | 1089             | NA                   | Prior statins versus No statins                                                 | 1 m                        | NA                                 | NA                   |
| Dowlatshahi et al. <sup>11</sup> | Canada        | 537                | 379                    | 237 | 1692             | 158                  | Prior statins versus No statins<br>Continued statins versus stopped statins     | DC/1m/6 m <sup>a</sup>     | mRS                                | DC                   |
| Romero et al. <sup>12</sup>      | Brazil        | 20                 | NA                     | NA  | 63               | NA                   | Prior statins versus No statins                                                 | 3 m                        | GOS                                | 3 m                  |
| Miura et al. <sup>13</sup>       | Japan         | 56                 | NA                     | NA  | 325              | NA                   | Prior statins versus No statins                                                 | NA                         | HV/mRS                             | 1 m <sup>β</sup>     |
| Biffi et al. <sup>14</sup>       | USA           | 238                | 209                    | 19  | 442              | 29                   | Prior statins versus No statins                                                 | 3 m <sup>a</sup>           | mRS                                | 3 m <sup>a</sup>     |
| Ricard et al. <sup>15</sup>      | Canada        | 71                 | NA                     | NA  | 232              | NA                   | Prior statins versus No statins                                                 | DC                         | HV/HE <sup>β</sup>                 | NA                   |
| Gomis et al. <sup>16</sup>       | Spain         | 34                 | NA                     | NA  | 235              | NA                   | Prior statins versus No statins                                                 | 3 m                        | mRS                                | 3 m <sup>a</sup>     |
| Eichel et al. <sup>17</sup>      | Israel        | 101                | NA                     | NA  | 298              | NA                   | Prior statins versus No statins                                                 | 3 m                        | mRS/NIHSS<br>HV <sup>a</sup>       | 3 m                  |
| Tapia-Perez et al. <sup>18</sup> | Mexico        | NA                 | NA                     | 18  | 57               | NA                   | Inpatient statin versus no statins                                              | DC <sup>a</sup>            | NIHSS                              | DC <sup>a</sup>      |
| Leker et al. <sup>19</sup>       | Israel        | 89                 | 89                     | NA  | 223              | NA                   | Prior statins versus No statins                                                 | DC <sup>a</sup>            | DC to home/rehab                   | DC <sup>a</sup>      |
| Agmazov et al. <sup>20</sup>     | Russia        | NA                 | NA                     | 11  | 12               | NA                   | Inpatient statin versus no statins                                              | NA                         | mRS                                | 1 m <sup>a</sup>     |
| Naval et al. <sup>21</sup>       | USA           | 32                 | NA                     | NA  | 93               | NA                   | Prior statins versus No statins                                                 | 1 m                        | mRS/GOS/PE                         | DC <sup>a</sup>      |

|                                  |     |     |    |    |     |    |                                    |     |     |     |
|----------------------------------|-----|-----|----|----|-----|----|------------------------------------|-----|-----|-----|
| FitzMaurice et al. <sup>22</sup> | USA | 149 | NA | NA | 480 | NA | Prior statins versus<br>No statins | 3 m | GOS | 3 m |
|----------------------------------|-----|-----|----|----|-----|----|------------------------------------|-----|-----|-----|

†Prior, Prehospital use of statins; ‡Continued, Pre-and in-hospital use of statins; \*Stopped, withdrawal of statins during hospital admission;  $\alpha$ , Worse in non-statin group;  $\beta$ , Worse in Statin group;

NA, not available; m, month; y, year; GOS, Glasgow outcome score; GCS, Glasgow coma scale; mRS, Modified Rankin Scale; NIHSS, National Institute of Health Stroke Scale; HV, Admission hematoma volume; HE, Hematoma expansion; PE, Perihematoma Edema

**Online Supplementary Table II:** Comparison of patients who were enrolled versus who were not enrolled in ERICH

|                                   | <b>Enrolled,<br/>N=3000</b> | <b>Not-Enrolled,<br/>N=373</b> | <b>p-value</b> |
|-----------------------------------|-----------------------------|--------------------------------|----------------|
| Age, mean±SD                      | 62.0±14.5                   | 65.1±14.5                      | 0.0001         |
| Female Sex, <i>N</i> (%)          | 1235 (41.2)                 | 152 (40.8)                     | 0.9098         |
| Race/Ethnicity                    |                             |                                |                |
| • Black                           | 1000 (33.3)                 | 121 (32.4)                     |                |
| • Hispanic                        | 1000 (33.3)                 | 72 (19.3)                      |                |
| • White                           | 1000 (33.3)                 | 180 (48.3)                     | <0.0001        |
| PMH                               |                             |                                |                |
| • Hypertension                    | 2407 (81.5)                 | 287 (80.6)                     | 0.6921         |
| • Diabetes                        | 830 (28.2)                  | 92 (26.2)                      | 0.4299         |
| • Hypercholesterolemia            | 924 (33.0)                  | 102 (29.4)                     | 0.1725         |
| • Anticoagulant Use               | 335 (11.2)                  | 48 (12.9)                      | 0.3285         |
| • Alcohol Use                     | 1137 (40.7)                 | 96 (30.8)                      | 0.0006         |
| Inpatient Death                   | 334 (11.1)                  | 118 (31.6)                     | <0.0001*       |
| Discharged to Hospice             | 97 (3.2)                    | 18 (4.8)                       |                |
| †Discharge to:                    |                             |                                |                |
| • Home/Relative/Friend            | 851 (33.3)                  | 75 (33.3)                      |                |
| • Rehabilitation                  | 1117(43.7)                  | 93 (41.3)                      |                |
| • SNF/Assisted Living             | 467 (18.3)                  | 39 (17.3)                      |                |
| • Hospital/Acute/Subacute Setting | 121 (4.7)                   | 18 (8.0)                       | 0.1886         |

SD=Standard Deviation; SNF= Skilled Nursing Facility

\* Represents comparison of 431 (14.4) enrolled vs. 136 (36.4) not enrolled.

† Inpatient deaths, discharges to hospice, and unknown discharge disposition (13 enrolled, and 12 not-enrolled) are not included in the comparison of discharge disposition. Percentages are based on the reduced denominators (2556 enrolled, and 225 not-enrolled).

**Online Supplementary Table III: Detailed Comparison of Baseline Characteristics and Outcomes Between Statin Users and Non-Statin Users**

| Variables                                  | Statin users          |                      |                      |                      | Non-statin users       | P value |
|--------------------------------------------|-----------------------|----------------------|----------------------|----------------------|------------------------|---------|
|                                            | Total                 | Prior                | Continued            | New                  |                        |         |
| <b>N</b>                                   | 1093                  | 268                  | 423                  | 402                  | 1364                   |         |
| <b>Age (years)</b><br>mean±SD              | N=1093<br>65.1±13.6   | N=268<br>70.4±12.5   | N=423<br>68.2±12.7   | N=402<br>58.4±12.5   | N=1364<br>60.3±15.0    | <.0001  |
| <b>Gender</b>                              | N=1093                | N=268                | N=423                | N=402                | N=1364                 |         |
| Male                                       | 659 (60.3%)           | 158 (59.0%)          | 247 (58.4%)          | 254 (63.2%)          | 776 (56.9%)            | 0.0892  |
| Female                                     | 434 (39.7%)           | 110 (41.0%)          | 176 (41.6%)          | 148 (36.8%)          | 588 (43.1%)            |         |
| <b>Race/ethnicity</b>                      | N=1093                | N=268                | N=423                | N=402                | N=1364                 | <.0001  |
| Black                                      | 318 (29.1%)           | 73 (27.2%)           | 101 (23.9%)          | 144 (35.8%)          | 480 (35.2%)            |         |
| Hispanic                                   | 358 (32.8%)           | 74 (27.6%)           | 107 (25.3%)          | 177 (44.0%)          | 481 (35.3%)            |         |
| White                                      | 417 (38.2%)           | 121 (45.1%)          | 215 (50.8%)          | 81 (20.1%)           | 403 (29.5%)            |         |
| <b>History of ischemic stroke</b>          | N=1093<br>197 (18.0%) | N=268<br>67 (25.0%)  | N=423<br>81 (19.1%)  | N=402<br>49 (12.2%)  | N=1364<br>117 (8.6%)   | <.0001  |
| <b>History of Diabetes</b>                 | N=1093<br>429 (39.2%) | N=268<br>126 (47.0%) | N=423<br>203 (48.0%) | N=402<br>100 (24.9%) | N=1362<br>293 (21.5%)  | <.0001  |
| <b>History of Alzheimer disease</b>        | N=1093<br>22 (2.0%)   | N=268<br>6 (2.2%)    | N=423<br>13 (3.1%)   | N=402<br>3 (0.7%)    | N=1364<br>23 (1.7%)    | 0.5485  |
| <b>History of Dementia (non-Alzheimer)</b> | N=1093<br>55 (5.0%)   | N=268<br>30 (11.2%)  | N=423<br>21 (5.0%)   | N=402<br>4 (1.0%)    | N=1364<br>52 (3.8%)    | 0.1410  |
| <b>History of hypertension</b>             | N=1092<br>994 (91.0%) | N=268<br>247 (92.2%) | N=423<br>401 (94.8%) | N=401<br>346 (86.3%) | N=1356<br>1090 (80.4%) | <.0001  |
| <b>History of high cholesterol</b>         | N=1086<br>757 (69.7%) | N=268<br>236 (88.1%) | N=422<br>395 (93.6%) | N=396<br>126 (31.8%) | N=1332<br>364 (27.3%)  | <.0001  |
| <b>Prior use of antiplatelet therapy</b>   | N=1093<br>119 (10.9%) | N=268<br>49 (18.3%)  | N=423<br>60 (14.2%)  | N=402<br>10 (2.5%)   | N=1364<br>37 (2.7%)    | <.0001  |
| <b>Prior use of anticoagulants</b>         | N=1093<br>183 (16.7%) | N=268<br>61 (22.8%)  | N=423<br>105 (24.8%) | N=402<br>17 (4.2%)   | N=1364<br>114 (8.4%)   | <.0001  |
| <b>Prior use of alcohol</b>                | N=1093                | N=268                | N=423                | N=402                | N=1364                 | <.0001  |
| None/rare                                  | 711 (65.1%)           | 198 (73.9%)          | 287 (67.8%)          | 226 (56.2%)          | 768 (56.3%)            |         |
| Moderate                                   | 247 (22.6%)           | 52 (19.4%)           | 97 (22.9%)           | 98 (24.4%)           | 349 (25.6%)            |         |
| Intermediate                               | 38 (3.5%)             | 8 (3.0%)             | 12 (2.8%)            | 18 (4.5%)            | 53 (3.9%)              |         |
| Frequent                                   | 86 (7.9%)             | 10 (3.7%)            | 22 (5.2%)            | 54 (13.4%)           | 152 (11.1%)            |         |
| Unknown                                    | 11 (1.0%)             | 0 (0.0%)             | 5 (1.2%)             | 6 (1.5%)             | 42 (3.1%)              |         |
| <b>APOE genotype</b>                       | N=1071                | N=256                | N=416                | N=399                | N=1335                 | 0.2659  |
| E2/E2                                      | 9 (0.8%)              | 0 (0.0%)             | 6 (1.4%)             | 3 (0.8%)             | 8 (0.6%)               |         |
| E2/E3                                      | 102 (9.5%)            | 31 (12.1%)           | 41 (9.9%)            | 30 (7.5%)            | 162 (12.1%)            |         |
| E2/E4                                      | 32 (3.0%)             | 11 (4.3%)            | 9 (2.2%)             | 12 (3.0%)            | 52 (3.9%)              |         |
| E3/E3                                      | 643 (60.0%)           | 135 (52.7%)          | 254 (61.1%)          | 254 (63.7%)          | 765 (57.3%)            |         |
| E3/E4                                      | 243 (22.7%)           | 70 (27.3%)           | 90 (21.6%)           | 83 (20.8%)           | 295 (22.1%)            |         |
| E4/E4                                      | 42 (3.9%)             | 9 (3.5%)             | 16 (3.8%)            | 17 (4.3%)            | 53 (4.0%)              |         |
| <b>ICH category</b>                        | N=1093                | N=268                | N=423                | N=402                | N=1364                 | 0.0293  |
| Lobar                                      | 366 (33.5%)           | 116 (43.3%)          | 162 (38.3%)          | 88 (21.9%)           | 407 (29.8%)            |         |
| Deep (Includes Primary IVH)                | 599 (54.8%)           | 119 (44.4%)          | 211 (49.9%)          | 269 (66.9%)          | 769 (56.4%)            |         |
| Brainstem                                  | 45 (4.1%)             | 11 (4.1%)            | 14 (3.3%)            | 20 (5.0%)            | 88 (6.5%)              |         |

|                                                                                                 |                |                |               |               |                |        |
|-------------------------------------------------------------------------------------------------|----------------|----------------|---------------|---------------|----------------|--------|
| Cerebellum                                                                                      | 83 (7.6%)      | 22 (8.2%)      | 36 (8.5%)     | 25 (6.2%)     | 100 (7.3%)     |        |
| <b>Prestroke mRS</b>                                                                            | N=1088         | N=265          | N=422         | N=401         | N=1358         | <.0001 |
| 0                                                                                               | 707 (65.0%)    | 139 (52.5%)    | 260 (61.6%)   | 308 (76.8%)   | 1011 (74.4%)   |        |
| 1                                                                                               | 155 (14.2%)    | 42 (15.8%)     | 70 (16.6%)    | 43 (10.7%)    | 127 (9.4%)     |        |
| 2                                                                                               | 131 (12.0%)    | 44 (16.6%)     | 52 (12.3%)    | 35 (8.7%)     | 107 (7.9%)     |        |
| 3                                                                                               | 56 (5.1%)      | 24 (9.1%)      | 25 (5.9%)     | 7 (1.7%)      | 62 (4.6%)      |        |
| 4                                                                                               | 34 (3.1%)      | 14 (5.3%)      | 12 (2.8%)     | 8 (2.0%)      | 40 (2.9%)      |        |
| 5                                                                                               | 5 (0.5%)       | 2 (0.8%)       | 3 (0.7%)      | 0 (0.0%)      | 11 (0.8%)      |        |
| <b>Admission GCS</b>                                                                            | N=1080         | N=265          | N=415         | N=400         | N=1348         | <.0001 |
| mean±SD                                                                                         | 12.9±3.4       | 11.1±4.2       | 13.7±2.5      | 13.3±3.0      | 11.9±4.0       |        |
| median,IQR                                                                                      | 15,12-15       | 13, 7-15       | 15, 14-15     | 15, 13-15     | 14, 9-15       |        |
| <b>Onset to arrival in ED</b>                                                                   | N=1093         | N=268          | N=423         | N=402         | N=1364         | 0.5196 |
| ≤6hr                                                                                            | 457 (41.8%)    | 115 (42.9%)    | 162 (38.3%)   | 180 (44.8%)   | 564 (41.3%)    |        |
| 6-12hr                                                                                          | 267 (24.4%)    | 85 (31.7%)     | 87 (20.6%)    | 95 (23.6%)    | 369 (27.1%)    |        |
| 12-24hr                                                                                         | 118 (10.8%)    | 25 (9.3%)      | 52 (12.3%)    | 41 (10.2%)    | 136 (10.0%)    |        |
| 24-48hr                                                                                         | 56 (5.1%)      | 7 (2.6%)       | 32 (7.6%)     | 17 (4.2%)     | 63 (4.6%)      |        |
| >48hr                                                                                           | 84 (7.7%)      | 12 (4.5%)      | 46 (10.9%)    | 26 (6.5%)     | 86 (6.3%)      |        |
| unknown                                                                                         | 111 (10.2%)    | 24 (9.0%)      | 44 (10.4%)    | 43 (10.7%)    | 146 (10.7%)    |        |
| <b>Hematoma volume (CT imaging within 6 hrs of onset)</b>                                       | N=373          | N=98           | N=135         | N=140         | N=476          | 0.0765 |
| mean±SD                                                                                         | 20.2±26.7      | 39.2±39.6      | 13.7±15.8     | 13.3±15.3     | 21.2±24.0      |        |
| median,IQR                                                                                      | 10.0, 4.0-25.4 | 25.5, 8.2-61.2 | 7.7, 2.6-18.3 | 8.8, 3.9-15.2 | 12.2, 4.9-27.8 |        |
| <b>Hematoma volume (CT imaging within 6 hrs and with follow-up imaging 6hr to 5 days later)</b> | N=294          | N=72           | N=109         | N=113         | N=334          |        |
| <b>First CT</b>                                                                                 |                |                |               |               |                | 0.1383 |
| mean±SD                                                                                         | 17.7±21.7      | 31.7±32.2      | 14.4±16.7     | 12.1±11.8     | 19.1±21.9      |        |
| median,IQR                                                                                      | 9.5, 4.0-23.0  | 20.2, 7.5-52.5 | 8.5, 3.0-18.3 | 8.3, 4.1-15.0 | 11.2, 4.9-25.8 |        |
| <b>Subsequent CT</b>                                                                            |                |                |               |               |                | 0.1708 |
| mean±SD                                                                                         | 21.8±27.1      | 37.3±39.9      | 19.0±22.4     | 14.7±14.6     | 22.7±24.5      |        |
| median,IQR                                                                                      | 12.6, 4.5-27.8 | 19.3, 6.9-64.3 | 9.6, 3.5-27.8 | 9.5, 4.1-20.4 | 13.7, 5.3-32.4 |        |
| <b>Difference in volume (CT2 vol &lt; CT1 vol)</b>                                              | 112 (38.1%)    | 31 (43.1%)     | 33 (30.3%)    | 48 (42.5%)    | 110 (32.9%)    | 0.0852 |
| Growth <1 ml                                                                                    | 74 (25.2%)     | 13 (18.1%)     | 34 (31.2%)    | 27 (23.9%)    | 71 (21.3%)     |        |
| 1-3 ml                                                                                          | 23 (7.8%)      | 5 (6.9%)       | 8 (7.3%)      | 10 (8.8%)     | 58 (17.4%)     |        |
| 3-6 ml                                                                                          | 20 (6.8%)      | 5 (6.9%)       | 7 (6.4%)      | 8 (7.1%)      | 24 (7.2%)      |        |
| 6-9 ml                                                                                          | 19 (6.5%)      | 5 (6.9%)       | 7 (6.4%)      | 7 (6.2%)      | 17 (5.1%)      |        |
| 9-14 ml                                                                                         | 16 (5.4%)      | 1 (1.4%)       | 9 (8.3%)      | 6 (5.3%)      | 24 (7.2%)      |        |
| 14-19 ml                                                                                        | 9 (3.1%)       | 2 (2.8%)       | 3 (2.8%)      | 4 (3.5%)      | 8 (2.4%)       |        |
| 24-33 ml                                                                                        | 10 (3.4%)      | 3 (4.2%)       | 5 (4.6%)      | 2 (1.8%)      | 13 (3.9%)      |        |
| 33-44 ml                                                                                        | 6 (2.0%)       | 3 (4.2%)       | 2 (1.8%)      | 1 (0.9%)      | 5 (1.5%)       |        |
| 44-58 ml                                                                                        | 2 (0.7%)       | 2 (2.8%)       | 0 (0.0%)      | 0 (0.0%)      | 3 (0.9%)       |        |
| ≥58 ml                                                                                          | 3 (1.0%)       | 2 (2.8%)       | 1 (0.9%)      | 0 (0.0%)      | 1 (0.3%)       |        |
| <b>Presence of Microbleeds</b>                                                                  | N=431          | N=62           | N=175         | N=194         | N=451          | 0.6653 |
|                                                                                                 | 225 (52.2%)    | 32 (51.6%)     | 73 (41.7%)    | 120 (61.9%)   | 242 (53.7%)    |        |
| <b>Microbleed Location</b>                                                                      | N=338          | N=48           | N=123         | N=167         | N=350          | 0.5512 |
| Lobar only                                                                                      | 28 (8.3%)      | 6 (12.5%)      | 16 (13.0%)    | 6 (3.6%)      | 33 (9.4%)      |        |
| Non-Lobar only                                                                                  | 56 (16.6%)     | 6 (12.5%)      | 10 (8.1%)     | 40 (24.0%)    | 45 (6.5%)      |        |
| Non-Lobar plus Lobar                                                                            | 93 (27.5%)     | 13 (27.1%)     | 24 (19.5%)    | 56 (33.5%)    | 103 (29.4%)    |        |
| <b>Lipid panel on admission</b>                                                                 |                |                |               |               |                |        |
| Total cholesterol                                                                               | N=723          | N=114          | N=265         | N=344         | N=715          | 0.6881 |
| mean±SD                                                                                         | 174.3±49.7     | 157.4±46.6     | 154.7±43.0    | 195.1±47.2    | 173.4±41.8     |        |
| LDL                                                                                             | N=714          | N=111          | N=262         | N=341         | N=702          | 0.9061 |
| mean±SD                                                                                         | 101.3±41.5     | 84.6±39.6      | 85.4±36.1     | 119.0±38.9    | 99.7±36.5      |        |
| HDL                                                                                             | N=715          | N=112          | N=263         | N=340         | N=701          | 0.0034 |

|                          |                       |                      |                      |                      |                       |        |
|--------------------------|-----------------------|----------------------|----------------------|----------------------|-----------------------|--------|
| mean±SD                  | 48.1±16.7             | 50.7±17.6            | 45.8±14.5            | 49.0±17.8            | 51.5±19.6             |        |
| Triglycerides<br>mean±SD | N=730<br>124.8±80.7   | N=119<br>110.1±80.2  | N=265<br>124.1±101.5 | N=346<br>137.1±112.2 | N=732<br>113.6±72.7   | 0.0012 |
| <b>In-hospital death</b> | N=1093<br>90 (8.2%)   | N=268<br>90 (33.6%)  | N=423<br>0 (0.0%)    | N=402<br>0 (0.0%)    | N=1364<br>232 (17.0%) | <.0001 |
| <b>3-month mortality</b> | N=1093<br>191 (17.5%) | N=268<br>146 (54.5%) | N=423<br>29 (6.9%)   | N=402<br>16 (4.0%)   | N=1364<br>354 (26.0%) | <.0001 |
| <b>3-month Rankin</b>    | N=1093                | N=268                | N=423                | N=402                | N=1364                | <.0001 |
| 0                        | 43 (3.9%)             | 3 (1.1%)             | 25 (5.9%)            | 15 (3.7%)            | 65 (4.8%)             |        |
| 1                        | 174 (15.9%)           | 18 (6.7%)            | 72 (17.0%)           | 84 (20.9%)           | 207 (15.2%)           |        |
| 2                        | 187 (17.1%)           | 18 (6.7%)            | 74 (17.5%)           | 95 (23.6%)           | 209 (15.3%)           |        |
| 3                        | 178 (16.3%)           | 23 (8.6%)            | 82 (19.4%)           | 73 (18.2%)           | 191 (14.0%)           |        |
| 4                        | 230 (21.0%)           | 37 (13.8%)           | 106 (25.1%)          | 87 (21.6%)           | 233 (17.1%)           |        |
| 5                        | 90 (8.2%)             | 23 (8.6%)            | 35 (8.3%)            | 32 (8.0%)            | 105 (7.7%)            |        |
| 6                        | 191 (17.5%)           | 146 (54.5%)          | 29 (6.9%)            | 16 (4.0%)            | 354 (26.0%)           |        |

**Online Supplementary Table IV:** Comparison of the cerebral microbleed location and statin use\*

|                      | <b>Prior</b> | <b>Continued</b> | <b>New</b>  | <b>P-value</b> |
|----------------------|--------------|------------------|-------------|----------------|
| Cerebral Microbleed  | N=48         | N=123            | N=167       |                |
| Microbleed Present   | 25 (52.1%)   | 50 (40.7%)       | 102 (61.1%) | 0.0027         |
| Lobar only           | 6 (12.5%)    | 16 (13.0%)       | 6 (3.6%)    | 0.0083         |
| Non-Lobar only       | 6 (12.5%)    | 10 (8.1%)        | 40 (24.0%)  | 0.0012         |
| Non-Lobar plus Lobar | 13 (27.1%)   | 24 (19.5%)       | 56 (33.5%)  | 0.0304         |

\* Microbleed location subgroups counted among those with and without microbleeds



## References:

1. Tapia-Perez JH, Zilke R, Schneider T. Match-study of statin therapy in spontaneous intracerebral hemorrhage: Is the discontinuation reasonable? *Journal of neurosurgical sciences*. 2016;60:301-312
2. Priglinger M, Arima H, Anderson C, Krause M. No relationship of lipid-lowering agents to hematoma growth: Pooled analysis of the intensive blood pressure reduction in acute cerebral hemorrhage trials studies. *Stroke; a journal of cerebral circulation*. 2015;46:857-859
3. Gioia LC, Kate M, McCourt R, Gould B, Coutts SB, Dowlathshahi D, et al. Perihematoma cerebral blood flow is unaffected by statin use in acute intracerebral hemorrhage patients. *Journal of cerebral blood flow and metabolism : official journal of the International Society of Cerebral Blood Flow and Metabolism*. 2015;35:1175-1180
4. Pan YS, Jing J, Wang YL, Zhao XQ, Song B, Wang WJ, et al. Use of statin during hospitalization improves the outcome after intracerebral hemorrhage. *CNS neuroscience & therapeutics*. 2014;20:548-555
5. Flint AC, Conell C, Rao VA, Klingman JG, Sidney S, Johnston SC, et al. Effect of statin use during hospitalization for intracerebral hemorrhage on mortality and discharge disposition. *JAMA neurology*. 2014;71:1364-1371
6. Falcone GJ, Brouwers HB, Biffi A, Anderson CD, Battey TW, Ayres AM, et al. Warfarin and statins are associated with hematoma volume in primary infratentorial intracerebral hemorrhage. *Neurocritical care*. 2014;21:192-199
7. Winkler J, Shoup JP, Czap A, Staff I, Fortunato G, McCullough LD, et al. Long-term improvement in outcome after intracerebral hemorrhage in patients treated with statins. *Journal of stroke and cerebrovascular diseases : the official journal of National Stroke Association*. 2013;22:e541-545
8. Tapia-Perez JH, Rupa R, Zilke R, Gehring S, Voellger B, Schneider T. Continued statin therapy could improve the outcome after spontaneous intracerebral hemorrhage. *Neurosurgical review*. 2013;36:279-287; discussion 287
9. Mustanoja S, Strbian D, Putaala J, Meretoja A, Curtze S, Haapaniemi E, et al. Association of prestroke statin use and lipid levels with outcome of intracerebral hemorrhage. *Stroke; a journal of cerebral circulation*. 2013;44:2330-2332
10. King NK, Tay VK, Allen JC, Ang BT. Prior statin use has no effect on survival after intracerebral hemorrhage in a multiethnic asian patient cohort. *Acta neurochirurgica. Supplement*. 2012;114:343-346
11. Dowlathshahi D, Demchuk AM, Fang J, Kapral MK, Sharma M, Smith EE, et al. Association of statins and statin discontinuation with poor outcome and survival after intracerebral hemorrhage. *Stroke; a journal of cerebral circulation*. 2012;43:1518-1523
12. Romero FR, Bertolini Ede F, Veloso VN, Venturini L, Figueiredo EG. Outcomes from intracerebral hemorrhage among patients pre-treated with statins. *Arquivos de neuro-psiquiatria*. 2011;69:452-454
13. Miura K, Yoshii Y, Nakamura Y, Ikeda K. Clinicoradiological profile and serum lipid levels of intracerebral hemorrhage in prior statin users. *Intern Med*. 2011;50:1385-1391
14. Biffi A, Devan WJ, Anderson CD, Ayres AM, Schwab K, Cortellini L, et al. Statin use and outcome after intracerebral hemorrhage: Case-control study and meta-analysis. *Neurology*. 2011;76:1581-1588

15. Ricard G, Garant MP, Carrier N, Leblanc N, Boulanger JM. Statins may increase intracerebral hemorrhage volume. *The Canadian journal of neurological sciences. Le journal canadien des sciences neurologiques*. 2010;37:791-796
16. Gomis M, Ois A, Rodriguez-Campello A, Cuadrado-Godia E, Jimenez-Conde J, Subirana I, et al. Outcome of intracerebral haemorrhage patients pre-treated with statins. *European journal of neurology : the official journal of the European Federation of Neurological Societies*. 2010;17:443-448
17. Eichel R, Khoury ST, Ben-Hur T, Keidar M, Paniri R, Leker RR. Prior use of statins and outcome in patients with intracerebral haemorrhage. *European journal of neurology : the official journal of the European Federation of Neurological Societies*. 2010;17:78-83
18. Tapia-Perez H, Sanchez-Aguilar M, Torres-Corzo JG, Rodriguez-Leyva I, Gonzalez-Aguirre D, Gordillo-Moscoso A, et al. Use of statins for the treatment of spontaneous intracerebral hemorrhage: Results of a pilot study. *Central European neurosurgery*. 2009;70:15-20
19. Leker RR, Khoury ST, Rafaeli G, Shwartz R, Eichel R, Tanne D. Prior use of statins improves outcome in patients with intracerebral hemorrhage: Prospective data from the national acute stroke israeli surveys (nasis). *Stroke; a journal of cerebral circulation*. 2009;40:2581-2584
20. Agmazov MK, Ivanova NE, Belinskaia VG, Toshpulatov Sh P, Arzikulov TN. [the use of simvastatin in patients with hypertensive intracerebral hemorrhages]. *Zhurnal nevrologii i psikhiatrii imeni S.S. Korsakova / Ministerstvo zdravookhraneniia i meditsinskoi promyshlennosti Rossiiskoi Federatsii, Vserossiiskoe obshchestvo nevrologov [i] Vserossiiskoe obshchestvo psikhiat*. 2009;109:15-18
21. Naval NS, Abdelhak TA, Zeballos P, Urrunaga N, Mirski MA, Carhuapoma JR. Prior statin use reduces mortality in intracerebral hemorrhage. *Neurocritical care*. 2008;8:6-12
22. FitzMaurice E, Wendell L, Snider R, Schwab K, Chanderraj R, Kinnecom C, et al. Effect of statins on intracerebral hemorrhage outcome and recurrence. *Stroke; a journal of cerebral circulation*. 2008;39:2151-2154
